# Supplementary material
Source: MDPI journal article supplement (https://www.mdpi.com/2071-1050/15/15/11984)
Supplement: s1 [file s1]

Table S11. Efficiency changes of ICEVs TWW influenced by WTT

| Province       | a=0   | a=1    | a=2     | a=3     | a=4     | a=5     | a=6     | a=7     | a=8 | a=9     | a=10    |
|----------------|-------|--------|---------|---------|---------|---------|---------|---------|-----|---------|---------|
| Beijing        | 0.197 | 0.197  | 0.197   | 0.197   | 0.197   | 0.197   | 0.197   | 0.197   | #   | 0.197   | 0.197   |
| Tianjin        | 0.856 | 0.849  | 0.842   | 0.836   | 0.829   | 0.822   | 0.816   | 0.809   | #   | 0.796   | 0.789   |
| Hebei          | 0.767 | 0.767  | 0.767   | 0.767   | 0.767   | 0.767   | 0.767   | 0.767   | #   | 0.767   | 0.767   |
| Shanxi         | 0.909 | 0.909  | 0.909   | 0.909   | 0.909   | 0.909   | 0.909   | 0.909   | #   | 0.909   | 0.909   |
| Inner Mongolia | 0.679 | 0.679  | 0.679   | 0.679   | 0.679   | 0.679   | 0.679   | 0.679   | #   | 0.679   | 0.679   |
| Liaoning       | 0.871 | 0.871  | 0.871   | 0.871   | 0.871   | 0.871   | 0.871   | 0.871   | #   | 0.871   | 0.871   |
| Jilin          | 0.701 | 0.701  | 0.701   | 0.701   | 0.701   | 0.701   | 0.701   | 0.701   | #   | 0.701   | 0.701   |
| Heilongjiang   | 0.609 | 0.595  | 0.581   | 0.567   | 0.553   | 0.539   | 0.525   | 0.511   | #   | 0.488   | 0.481   |
| Shanghai       | 0.352 | 49.984 | 100.320 | 150.656 | 200.992 | 251.327 | 301.663 | 351.999 | #   | 452.671 | 503.007 |
| Jiangsu        | 0.610 | 0.610  | 0.610   | 0.610   | 0.610   | 0.610   | 0.610   | 0.610   | #   | 0.610   | 0.610   |
| Zhejiang       | 0.369 | 0.369  | 0.369   | 0.369   | 0.369   | 0.369   | 0.369   | 0.369   | #   | 0.369   | 0.369   |
| Anhui          | 0.817 | 0.817  | 0.817   | 0.817   | 0.817   | 0.817   | 0.817   | 0.817   | #   | 0.817   | 0.817   |
| Fujian         | 0.423 | 0.423  | 0.423   | 0.423   | 0.423   | 0.423   | 0.423   | 0.423   | #   | 0.423   | 0.423   |
| Jiangxi        | 0.690 | 0.000  | 0.000   | 0.000   | 0.000   | 0.000   | 0.000   | 0.000   | #   | 0.000   | 0.000   |
| Shandong       | 0.880 | 0.880  | 0.880   | 0.880   | 0.880   | 0.880   | 0.880   | 0.880   | #   | 0.880   | 0.880   |
| Henan          | 1.000 | 1.000  | 1.000   | 1.000   | 1.000   | 1.000   | 1.000   | 1.000   | #   | 1.000   | 1.000   |
| Hubei          | 0.539 | 0.532  | 0.525   | 0.519   | 0.512   | 0.506   | 0.499   | 0.499   | #   | 0.486   | 0.480   |
| Hunan          | 0.672 | 0.672  | 0.672   | 0.672   | 0.672   | 0.672   | 0.672   | 0.672   | #   | 0.672   | 0.672   |
| Guangdong      | 0.597 | 0.595  | 0.593   | 0.591   | 0.590   | 0.588   | 0.586   | 0.584   | #   | 0.580   | 0.579   |
| Guangxi        | 0.636 | 0.636  | 0.636   | 0.636   | 0.636   | 0.636   | 0.636   | 0.636   | #   | 0.636   | 0.636   |



[illegible]

Table S13. Efficiency changes of PHEVs TWW influenced by WTT

| Province       | a=0  | a=1   | a=2   | a=3   | a=4   | a=5   | a=6   | a=7   | a=8   | a=9   | a=10  |
|----------------|------|-------|-------|-------|-------|-------|-------|-------|-------|-------|-------|
| Beijing        | 0.36 | 0.366 | 0.366 | 0.366 | 0.366 | 0.366 | 0.366 | 0.366 | 0.366 | 0.366 | 0.366 |
| Tianjin        | 0.85 | 0.849 | 0.842 | 0.836 | 0.829 | 0.822 | 0.816 | 0.809 | 0.803 | 0.796 | 0.789 |
| Hebei          | 0.72 | 0.723 | 0.723 | 0.723 | 0.723 | 0.723 | 0.723 | 0.723 | 0.723 | 0.723 | 0.723 |
| Shanxi         | 0.76 | 0.767 | 0.767 | 0.767 | 0.767 | 0.767 | 0.767 | 0.767 | 0.767 | 0.767 | 0.767 |
| Inner Mongolia | 0.94 | 0.948 | 0.948 | 0.948 | 0.948 | 0.948 | 0.948 | 0.948 | 0.948 | 0.948 | 0.948 |
| Liaoning       | 0.90 | 0.906 | 0.906 | 0.906 | 0.906 | 0.906 | 0.906 | 0.906 | 0.906 | 0.906 | 0.906 |
| Jilin          | 0.26 | 0.261 | 0.261 | 0.261 | 0.261 | 0.261 | 0.261 | 0.261 | 0.261 | 0.261 | 0.261 |
| Heilongjiang   | 0.00 | 0.000 | 0.000 | 0.000 | 0.000 | 0.000 | 0.000 | 0.000 | 0.000 | 0.000 | 0.000 |
| Shanghai       | 0.35 | -     | -     | -     | -     | -     | -     | -     | -     | -     | -     |
| Jiangsu        | 0.52 | 0.524 | 0.524 | 0.524 | 0.524 | 0.524 | 0.524 | 0.524 | 0.524 | 0.524 | 0.524 |
| Zhejiang       | 0.46 | 0.469 | 0.469 | 0.469 | 0.469 | 0.469 | 0.469 | 0.469 | 0.469 | 0.469 | 0.469 |
| Anhui          | 0.81 | 0.817 | 0.817 | 0.817 | 0.817 | 0.817 | 0.817 | 0.817 | 0.817 | 0.817 | 0.817 |
| Fujian         | 0.50 | 0.502 | 0.502 | 0.502 | 0.502 | 0.502 | 0.502 | 0.502 | 0.502 | 0.502 | 0.502 |
| Jiangxi        | 0.69 | 0.256 | 0.157 | 0.135 | 0.134 | 0.132 | 0.131 | 0.130 | 0.129 | 0.128 | 0.127 |
| Shandong       | 0.61 | 0.615 | 0.615 | 0.615 | 0.615 | 0.615 | 0.615 | 0.615 | 0.615 | 0.615 | 0.615 |
| Henan          | 1.00 | 1.000 | 1.000 | 1.000 | 1.000 | 1.000 | 1.000 | 1.000 | 1.000 | 1.000 | 1.000 |
| Hubei          | 0.56 | 0.565 | 0.561 | 0.556 | 0.552 | 0.548 | 0.543 | 0.539 | 0.535 | 0.531 | 0.526 |
| Hunan          | 0.53 | 0.539 | 0.539 | 0.539 | 0.539 | 0.539 | 0.539 | 0.539 | 0.539 | 0.539 | 0.539 |
| Guangdong      | 0.66 | 0.658 | 0.653 | 0.648 | 0.643 | 0.638 | 0.633 | 0.628 | 0.623 | 0.618 | 0.613 |
| Guangxi        | 0.50 | 0.504 | 0.504 | 0.504 | 0.504 | 0.504 | 0.504 | 0.504 | 0.504 | 0.504 | 0.504 |
| Hainan         | 0.34 | 0.343 | 0.338 | 0.332 | 0.326 | 0.321 | 0.315 | 0.309 | 0.304 | 0.298 | 0.292 |



[illegible]
