# Supplementary material
Source: MDPI journal article supplement (https://www.mdpi.com/2071-1050/15/15/11984)
Supplement: s1 [file s1]

Table S1. Temperature coefficients of provinces

| DMUs         | ICEV  | HEV   | PHEV  | EV    |
|--------------|-------|-------|-------|-------|
| Beijing      | 1.042 | 1.076 | 1.093 | 1.141 |
| Tianjin      | 1.042 | 1.076 | 1.094 | 1.143 |
| Hebei        | 1.037 | 1.065 | 1.079 | 1.118 |
| Shanxi       | 1.042 | 1.081 | 1.101 | 1.157 |
| Neimenggu    | 1.060 | 1.116 | 1.145 | 1.228 |
| Liaoning     | 1.059 | 1.111 | 1.138 | 1.215 |
| Jilin        | 1.068 | 1.129 | 1.161 | 1.251 |
| Heilongjiang | 1.078 | 1.148 | 1.185 | 1.289 |
| Shanghai     | 1.032 | 1.050 | 1.059 | 1.081 |
| Jiangsu      | 1.034 | 1.055 | 1.064 | 1.091 |
| Zhejiang     | 1.033 | 1.051 | 1.060 | 1.082 |
| Anhui        | 1.034 | 1.056 | 1.067 | 1.098 |
| Fujian       | 1.028 | 1.038 | 1.042 | 1.051 |
| Jiangxi      | 1.035 | 1.052 | 1.060 | 1.079 |
| Shandong     | 1.036 | 1.062 | 1.075 | 1.112 |
| Henan        | 1.035 | 1.058 | 1.069 | 1.100 |
| Hubei        | 1.037 | 1.058 | 1.068 | 1.095 |
| Hunan        | 1.034 | 1.053 | 1.062 | 1.085 |
| Guangdong    | 1.028 | 1.038 | 1.041 | 1.049 |
| Guangxi      | 1.023 | 1.032 | 1.034 | 1.041 |
| Hainan       | 1.032 | 1.043 | 1.046 | 1.053 |
| Chongqing    | 1.029 | 1.044 | 1.051 | 1.067 |
| Sichuan      | 1.019 | 1.035 | 1.043 | 1.066 |
| Guizhou      | 1.020 | 1.037 | 1.047 | 1.074 |
| Yunnan       | 1.009 | 1.018 | 1.022 | 1.035 |
| Shaanxi      | 1.033 | 1.059 | 1.071 | 1.107 |
| Gansu        | 1.045 | 1.085 | 1.106 | 1.166 |
| Qinghai      | 1.059 | 1.114 | 1.143 | 1.224 |
| Ningxia      | 1.049 | 1.091 | 1.113 | 1.176 |
| Xinjiang     | 1.065 | 1.124 | 1.154 | 1.240 |

Table S2. Congestion coefficient of provinces

| DMUs    | ICEV  | HEV   | PHEV  | EV    |
|---------|-------|-------|-------|-------|
| Beijing | 1.334 | 1.334 | 1.141 | 1.023 |
| Tianjin | 1.171 | 1.171 | 1.071 | 1.010 |
| Hebei   | 1.203 | 1.203 | 1.086 | 1.014 |

|              |       |       |       |       |
|--------------|-------|-------|-------|-------|
| Shanxi       | 1.177 | 1.177 | 1.074 | 1.010 |
| Neimenggu    | 1.212 | 1.212 | 1.088 | 1.012 |
| Liaoning     | 1.127 | 1.127 | 1.053 | 1.007 |
| Jilin        | 1.115 | 1.115 | 1.049 | 1.008 |
| Heilongjiang | 1.114 | 1.114 | 1.051 | 1.012 |
| Shanghai     | 1.129 | 1.129 | 1.055 | 1.010 |
| Jiangsu      | 1.115 | 1.115 | 1.048 | 1.007 |
| Zhejiang     | 1.241 | 1.241 | 1.100 | 1.013 |
| Anhui        | 1.149 | 1.149 | 1.064 | 1.011 |
| Fujian       | 1.182 | 1.182 | 1.075 | 1.009 |
| Jiangxi      | 1.361 | 1.361 | 1.152 | 1.024 |
| Shandong     | 1.194 | 1.194 | 1.083 | 1.015 |
| Henan        | 1.162 | 1.162 | 1.067 | 1.009 |
| Hubei        | 1.144 | 1.144 | 1.060 | 1.008 |
| Hunan        | 1.150 | 1.150 | 1.064 | 1.012 |
| Guangdong    | 1.165 | 1.165 | 1.071 | 1.013 |
| Guangxi      | 1.139 | 1.139 | 1.058 | 1.009 |
| Hainan       | 1.128 | 1.128 | 1.054 | 1.008 |
| Chongqing    | 1.165 | 1.165 | 1.071 | 1.013 |
| Sichuan      | 1.273 | 1.273 | 1.113 | 1.014 |
| Guizhou      | 1.176 | 1.176 | 1.073 | 1.011 |
| Yunnan       | 1.140 | 1.140 | 1.059 | 1.008 |
| Shaanxi      | 1.169 | 1.169 | 1.072 | 1.013 |
| Gansu        | 1.162 | 1.162 | 1.069 | 1.012 |
| Qinghai      | 1.161 | 1.161 | 1.067 | 1.010 |
| Ningxia      | 1.287 | 1.287 | 1.124 | 1.024 |
| Xinjiang     | 1.228 | 1.228 | 1.095 | 1.014 |

Table S3. First-stage DEA data of provinces

| DMUs    | First stage input   |                                         | Middle input/output                |                                  |              |
|---------|---------------------|-----------------------------------------|------------------------------------|----------------------------------|--------------|
|         | Thermal power ratio | Emissions of energy production per unit | Electricity self-sufficiency ratio | Electricity consumption emission | ICE emission |
| Beijing | 0.961               | 87.038                                  | 0.399                              | 206.5                            | 22.197       |
| Tianjin | 0.964               | 45.188                                  | 0.794                              | 242.0                            | 21.421       |
| Hebei   | 0.845               | 81.723                                  | 0.738                              | 231.0                            | 22.706       |
| Shanxi  | 0.881               | 24.492                                  | 0.918                              | 240.4                            | 22.808       |

|              |       |         |       |       |        |
|--------------|-------|---------|-------|-------|--------|
| Neimenggu    | 0.839 | 32.816  | 0.957 | 236.7 | 21.552 |
| Liaoning     | 0.712 | 64.665  | 0.772 | 205.1 | 22.799 |
| Jilin        | 0.767 | 83.477  | 0.879 | 203.0 | 23.191 |
| Heilongjiang | 0.820 | 36.443  | 1.000 | 212.9 | 21.723 |
| Shanghai     | 0.970 | 100.253 | 0.511 | 170.6 | 16.460 |
| Jiangsu      | 0.865 | 140.929 | 0.801 | 201.3 | 22.525 |
| Zhejiang     | 0.707 | 127.347 | 0.709 | 171.6 | 21.891 |
| Anhui        | 0.923 | 76.959  | 0.869 | 235.0 | 23.909 |
| Fujian       | 0.547 | 98.358  | 0.999 | 135.1 | 21.550 |
| Jiangxi      | 0.800 | 153.272 | 0.888 | 188.1 | 24.406 |
| Shandong     | 0.898 | 80.657  | 0.833 | 239.2 | 23.708 |
| Henan        | 0.884 | 78.186  | 0.776 | 238.5 | 23.905 |
| Hubei        | 0.497 | 103.228 | 0.955 | 133.1 | 22.466 |
| Hunan        | 0.587 | 85.755  | 0.806 | 149.2 | 23.101 |
| Guangdong    | 0.680 | 92.001  | 0.735 | 138.5 | 22.914 |
| Guangxi      | 0.545 | 83.226  | 0.906 | 124.0 | 23.462 |
| Hainan       | 0.614 | 62.510  | 0.953 | 143.6 | 19.122 |
| Chongqing    | 0.683 | 73.023  | 0.673 | 134.1 | 22.852 |
| Sichuan      | 0.130 | 19.859  | 0.971 | 31.6  | 20.374 |
| Guizhou      | 0.607 | 53.822  | 1.000 | 172.8 | 23.825 |
| Yunnan       | 0.091 | 17.149  | 1.000 | 18.4  | 24.570 |
| Shaanxi      | 0.848 | 23.087  | 0.908 | 223.6 | 21.925 |
| Gansu        | 0.483 | 49.925  | 0.824 | 129.2 | 23.410 |
| Qinghai      | 0.121 | 21.063  | 0.935 | 39.7  | 22.190 |
| Ningxia      | 0.818 | 69.497  | 0.840 | 209.2 | 23.133 |
| Xinjiang     | 0.771 | 44.899  | 0.997 | 227.2 | 23.509 |

Table S4. Second-stage DEA output of provinces

| DMUs         | ICEV    | HEV     | PHEV        | EV      |
|--------------|---------|---------|-------------|---------|
| Beijing      | 276.807 | 178.677 | 205.8249403 | 197.066 |
| Tianjin      | 241.628 | 156.512 | 213.9547397 | 213.727 |
| Hebei        | 250.997 | 161.726 | 211.1888098 | 201.719 |
| Shanxi       | 247.176 | 160.633 | 217.1486235 | 212.040 |
| Neimenggu    | 254.040 | 166.999 | 209.6919512 | 208.730 |
| Liaoning     | 240.280 | 158.073 | 188.3176182 | 186.994 |
| Jilin        | 240.799 | 159.570 | 215.1491544 | 219.122 |
| Heilongjiang | 238.467 | 159.089 | 231.7019769 | 248.199 |
| Shanghai     | 217.400 | 138.956 | 168.1840907 | 163.037 |

|           |         |         |             |         |
|-----------|---------|---------|-------------|---------|
| Jiangsu   | 232.012 | 148.862 | 192.2357281 | 181.636 |
| Zhejiang  | 255.257 | 163.146 | 177.2286419 | 160.246 |
| Anhui     | 242.822 | 155.988 | 229.8024358 | 218.931 |
| Fujian    | 241.392 | 153.389 | 136.9880103 | 119.991 |
| Jiangxi   | 288.275 | 183.975 | 224.1611502 | 191.232 |
| Shandong  | 251.918 | 162.172 | 218.0725023 | 204.851 |
| Henan     | 245.695 | 157.849 | 210.4212036 | 198.123 |
| Hubei     | 238.203 | 152.853 | 134.8391864 | 120.586 |
| Hunan     | 240.652 | 154.110 | 165.4482858 | 152.670 |
| Guangdong | 242.045 | 153.789 | 146.964759  | 120.630 |
| Guangxi   | 237.353 | 150.642 | 151.0125566 | 131.175 |
| Hainan    | 224.927 | 142.886 | 155.985959  | 152.726 |
| Chongqing | 242.124 | 154.465 | 153.719178  | 125.125 |
| Sichuan   | 254.371 | 162.137 | 62.3128333  | 40.286  |
| Guizhou   | 245.176 | 156.831 | 153.8031604 | 134.494 |
| Yunnan    | 237.847 | 151.036 | 55.16644889 | 26.673  |
| Shaanxi   | 241.076 | 155.084 | 200.1535278 | 191.677 |
| Gansu     | 246.311 | 160.397 | 130.8558076 | 111.881 |
| Qinghai   | 245.405 | 161.525 | 60.42315593 | 36.974  |
| Ningxia   | 271.796 | 176.738 | 210.8561115 | 190.485 |
| Xinjiang  | 264.283 | 174.059 | 212.0811009 | 205.186 |

Table S5. First stage DEA regulation of pure electric model in provinces

| DMUs         | First stage input      |                                  |                                        | Middle                                 | Efficiency |
|--------------|------------------------|----------------------------------|----------------------------------------|----------------------------------------|------------|
|              | Thermal power<br>ratio | Emissions of                     | Electricity self-<br>sufficiency ratio | input/output                           |            |
|              |                        | energy<br>production per<br>unit |                                        | Electricity<br>consumption<br>emission |            |
| Beijing      | 0.000                  | 0.000                            | 0.000                                  | 0.000                                  | 1.000      |
| Tianjin      | 0.013                  | 2.082                            | 0.000                                  | 0.000                                  | 0.970      |
| Hebei        | 0.000                  | 0.000                            | 0.000                                  | 0.000                                  | 1.000      |
| Shanxi       | 0.000                  | 0.000                            | 0.000                                  | 0.000                                  | 1.000      |
| Neimenggu    | 0.000                  | 0.000                            | 0.000                                  | 0.000                                  | 1.000      |
| Liaoning     | 0.000                  | 0.000                            | 0.000                                  | 0.000                                  | 1.000      |
| Jilin        | 0.030                  | 60.221                           | 0.048                                  | 0.000                                  | 0.649      |
| Heilongjiang | 0.000                  | 12.458                           | 0.118                                  | 12.179                                 | 0.676      |
| Shanghai     | 0.169                  | 26.551                           | 0.112                                  | 0.000                                  | 0.494      |

|           |       |        |       |       |       |
|-----------|-------|--------|-------|-------|-------|
| Jiangsu   | 0.000 | 76.312 | 0.260 | 0.000 | 0.579 |
| Zhejiang  | 0.000 | 75.701 | 0.156 | 0.000 | 0.604 |
| Anhui     | 0.040 | 47.299 | 0.000 | 0.000 | 0.720 |
| Fujian    | 0.074 | 77.349 | 0.328 | 0.000 | 0.449 |
| Jiangxi   | 0.000 | 92.826 | 0.353 | 0.000 | 0.532 |
| Shandong  | 0.000 | 35.707 | 0.000 | 0.000 | 0.813 |
| Henan     | 0.000 | 8.176  | 0.000 | 0.000 | 0.955 |
| Hubei     | 0.037 | 82.284 | 0.288 | 0.000 | 0.481 |
| Hunan     | 0.060 | 64.279 | 0.101 | 0.000 | 0.567 |
| Guangdong | 0.058 | 30.223 | 0.337 | 0.000 | 0.500 |
| Guangxi   | 0.111 | 62.584 | 0.260 | 0.000 | 0.436 |
| Hainan    | 0.103 | 41.219 | 0.261 | 0.000 | 0.476 |
| Chongqing | 0.081 | 12.880 | 0.274 | 0.000 | 0.545 |
| Sichuan   | 0.068 | 2.270  | 0.542 | 0.000 | 0.208 |
| Guizhou   | 0.000 | 29.834 | 0.230 | 0.000 | 0.601 |
| Yunnan    | 0.080 | 0.013  | 0.601 | 0.000 | 0.016 |
| Shaanxi   | 0.000 | 0.000  | 0.000 | 0.000 | 1.000 |
| Gansu     | 0.038 | 29.111 | 0.166 | 0.000 | 0.544 |
| Qinghai   | 0.032 | 3.207  | 0.486 | 0.000 | 0.324 |
| Ningxia   | 0.051 | 45.330 | 0.000 | 0.000 | 0.688 |
| Xinjiang  | 0.000 | 0.000  | 0.000 | 0.000 | 1.000 |

Table S6. First stage DEA regulation of non-pure electric model in provinces

| DMUs         | First stage input   |                                         | Middle input/output                |                                  | Efficiency   |       |
|--------------|---------------------|-----------------------------------------|------------------------------------|----------------------------------|--------------|-------|
|              | Thermal power ratio | Emissions of energy production per unit | Electricity self-sufficiency ratio | Electricity consumption emission | ICE emission |       |
|              |                     |                                         |                                    |                                  |              |       |
| Beijing      | 0.000               | 0.000                                   | 0.000                              | 0.000                            | 0.000        | 1.000 |
| Tianjin      | 0.013               | 2.082                                   | 0.000                              | 42.391                           | 0.000        | 0.856 |
| Hebei        | 0.000               | 0.000                                   | 0.000                              | 0.000                            | 0.000        | 1.000 |
| Shanxi       | 0.000               | 0.000                                   | 0.000                              | 0.000                            | 0.000        | 1.000 |
| Neimenggu    | 0.000               | 0.000                                   | 0.000                              | 0.000                            | 0.000        | 1.000 |
| Liaoning     | 0.000               | 0.000                                   | 0.000                              | 0.000                            | 0.000        | 1.000 |
| Jilin        | 0.000               | 50.143                                  | 0.000                              | 0.000                            | 0.000        | 0.748 |
| Heilongjiang | 0.023               | 12.858                                  | 0.000                              | 62.622                           | 0.000        | 0.640 |
| Shanghai     | 0.169               | 26.551                                  | 0.112                              | 128.010                          | 0.000        | 0.352 |
| Jiangsu      | 0.000               | 62.375                                  | 0.268                              | 0.000                            | 0.000        | 0.610 |

|           |       |        |       |        |       |       |
|-----------|-------|--------|-------|--------|-------|-------|
| Zhejiang  | 0.000 | 60.668 | 0.144 | 0.000  | 0.000 | 0.662 |
| Anhui     | 0.000 | 32.851 | 0.000 | 0.000  | 0.000 | 0.817 |
| Fujian    | 0.057 | 77.346 | 0.198 | 0.000  | 0.000 | 0.533 |
| Jiangxi   | 0.000 | 83.396 | 0.000 | 48.388 | 0.000 | 0.690 |
| Shandong  | 0.000 | 22.772 | 0.000 | 0.000  | 0.000 | 0.880 |
| Henan     | 0.000 | 0.000  | 0.000 | 0.000  | 0.000 | 1.000 |
| Hubei     | 0.000 | 82.278 | 0.012 | 27.483 | 0.000 | 0.620 |
| Hunan     | 0.000 | 45.064 | 0.000 | 0.000  | 0.000 | 0.781 |
| Guangdong | 0.000 | 27.485 | 0.146 | 0.000  | 0.267 | 0.719 |
| Guangxi   | 0.058 | 57.806 | 0.000 | 0.000  | 0.000 | 0.668 |
| Hainan    | 0.103 | 41.219 | 0.261 | 25.340 | 0.000 | 0.441 |
| Chongqing | 0.000 | 8.175  | 0.090 | 0.000  | 0.459 | 0.814 |
| Sichuan   | 0.033 | 2.265  | 0.280 | 0.000  | 0.000 | 0.463 |
| Guizhou   | 0.000 | 19.942 | 0.004 | 0.000  | 0.000 | 0.816 |
| Yunnan    | 0.000 | 0.000  | 0.000 | 0.000  | 0.000 | 1.000 |
| Shaanxi   | 0.000 | 0.000  | 0.000 | 0.000  | 0.000 | 1.000 |
| Gansu     | 0.000 | 2.121  | 0.000 | 0.000  | 0.000 | 0.978 |
| Qinghai   | 0.000 | 0.000  | 0.000 | 0.000  | 0.000 | 1.000 |
| Ningxia   | 0.000 | 32.992 | 0.000 | 0.000  | 0.040 | 0.788 |
| Xinjiang  | 0.000 | 0.000  | 0.000 | 0.000  | 0.000 | 1.000 |

Table S7. Second stage DEA regulation of ICEVs in provinces

| DMUs         | Middle input/output |          | Second stage input |            | Final output     | Efficiency | Overall efficiency |
|--------------|---------------------|----------|--------------------|------------|------------------|------------|--------------------|
|              | Electricity         | ICE      | Temperature        | Congestion | WTW              |            |                    |
|              | consumption         | emission |                    |            | carbon emissions |            |                    |
| Beijing      | 0.000               | 0.000    | 0.000              | 0.050      | 44.597           | 0.197      | 0.197              |
| Tianjin      | 0.000               | 0.000    | 0.000              | 0.000      | 0.000            | 1.000      | 0.856              |
| Hebei        | 0.000               | 0.000    | 0.000              | 0.012      | 10.849           | 0.767      | 0.767              |
| Shanxi       | 0.000               | 0.000    | 0.000              | 0.002      | 4.023            | 0.909      | 0.909              |
| Neimenggu    | 0.000               | 0.000    | 0.000              | 0.007      | 15.883           | 0.679      | 0.679              |
| Liaoning     | 0.000               | 0.000    | 0.001              | 0.000      | 6.844            | 0.871      | 0.871              |
| Jilin        | 0.000               | 0.000    | 0.004              | 0.000      | 2.610            | 0.937      | 0.701              |
| Heilongjiang | 0.000               | 0.000    | 0.004              | 0.000      | 1.837            | 0.950      | 0.609              |
| Shanghai     | 0.000               | 0.000    | 0.000              | 0.000      | 0.000            | 1.000      | 0.352              |
| Jiangsu      | 0.000               | 0.000    | 0.000              | 0.000      | 0.000            | 1.000      | 0.610              |
| Zhejiang     | 0.000               | 0.000    | 0.000              | 0.029      | 24.851           | 0.557      | 0.369              |



|           |       |       |       |       |        |       |       |
|-----------|-------|-------|-------|-------|--------|-------|-------|
| Fujian    | 0.000 | 0.000 | 0.000 | 0.014 | 6.427  | 0.816 | 0.435 |
| Jiangxi   | 0.000 | 0.000 | 0.000 | 0.000 | 0.000  | 1.000 | 0.690 |
| Shandong  | 0.000 | 0.000 | 0.000 | 0.007 | 4.568  | 0.822 | 0.723 |
| Henan     | 0.000 | 0.000 | 0.000 | 0.000 | 0.000  | 1.000 | 1.000 |
| Hubei     | 0.000 | 0.000 | 0.000 | 0.000 | 5.256  | 0.855 | 0.531 |
| Hunan     | 0.000 | 0.000 | 0.000 | 0.004 | 5.036  | 0.852 | 0.666 |
| Guangdong | 0.000 | 0.000 | 0.000 | 0.011 | 4.499  | 0.862 | 0.619 |
| Guangxi   | 0.000 | 0.000 | 0.000 | 0.004 | 0.085  | 0.994 | 0.664 |
| Hainan    | 0.000 | 0.000 | 0.000 | 0.000 | 0.000  | 1.000 | 0.441 |
| Chongqing | 0.000 | 0.000 | 0.000 | 0.009 | 5.644  | 0.833 | 0.678 |
| Sichuan   | 0.000 | 3.604 | 0.000 | 0.029 | 12.623 | 0.765 | 0.354 |
| Guizhou   | 0.000 | 0.000 | 0.000 | 0.011 | 2.874  | 0.896 | 0.731 |
| Yunnan    | 0.000 | 0.000 | 0.000 | 0.000 | 0.000  | 1.000 | 1.000 |
| Shaanxi   | 0.000 | 0.000 | 0.000 | 0.005 | 2.343  | 0.921 | 0.921 |
| Gansu     | 0.000 | 0.000 | 0.002 | 0.000 | 12.032 | 0.660 | 0.646 |
| Qinghai   | 0.000 | 1.400 | 0.009 | 0.000 | 12.819 | 0.665 | 0.665 |
| Ningxia   | 0.000 | 0.000 | 0.000 | 0.031 | 27.399 | 0.204 | 0.161 |
| Xinjiang  | 0.000 | 0.000 | 0.000 | 0.006 | 24.435 | 0.287 | 0.287 |

Table S9. Second stage DEA regulation of PHEVs in provinces

| DMUs         | Middle input/output              |              | Second stage input |            | Final output         | Efficiency | Overall efficiency |
|--------------|----------------------------------|--------------|--------------------|------------|----------------------|------------|--------------------|
|              | Electricity consumption emission | ICE emission | Temperature        | Congestion | WTW carbon emissions |            |                    |
| Beijing      | 0.000                            | 0.771        | 0.000              | 0.004      | 27.957               | 0.492      | 0.492              |
| Tianjin      | 0.000                            | 0.000        | 0.000              | 0.000      | 0.000                | 1.000      | 0.856              |
| Hebei        | 0.000                            | 1.280        | 0.000              | 0.000      | 9.899                | 0.708      | 0.708              |
| Shanxi       | 0.000                            | 0.000        | 0.003              | 0.000      | 5.813                | 0.712      | 0.712              |
| Neimenggu    | 0.000                            | 0.252        | 0.007              | 0.000      | 3.655                | 0.861      | 0.861              |
| Liaoning     | 0.000                            | 0.000        | 0.015              | 0.000      | 2.740                | 0.922      | 0.922              |
| Jilin        | 0.000                            | 0.000        | 0.019              | 0.000      | 30.867               | 0.340      | 0.254              |
| Heilongjiang | 0.000                            | 0.000        | 0.021              | 0.000      | 38.017               | 0.000      | 0.000              |
| Shanghai     | 0.000                            | 0.000        | 0.000              | 0.000      | 0.000                | 1.000      | 0.352              |
| Jiangsu      | 0.000                            | 0.000        | 0.003              | 0.000      | 8.863                | 0.813      | 0.495              |
| Zhejiang     | 0.000                            | 0.000        | 0.000              | 0.002      | 21.670               | 0.712      | 0.471              |
| Anhui        | 0.000                            | 0.000        | 0.000              | 0.000      | 0.000                | 1.000      | 0.817              |
| Fujian       | 0.000                            | 0.000        | 0.000              | 0.000      | 3.695                | 0.962      | 0.513              |



|           |       |       |       |       |        |       |       |
|-----------|-------|-------|-------|-------|--------|-------|-------|
| Jiangxi   | 0.000 | 0.000 | 0.000 | 0.000 | 0.000  | 1.000 | 0.690 |
| Shandong  | 0.000 | 0.239 | 0.000 | 0.001 | 8.278  | 0.626 | 0.551 |
| Henan     | 0.000 | 0.000 | 0.000 | 0.000 | 0.000  | 1.000 | 1.000 |
| Hubei     | 0.000 | 0.000 | 0.000 | 0.000 | 5.389  | 0.947 | 0.587 |
| Hunan     | 0.000 | 0.000 | 0.001 | 0.000 | 26.121 | 0.716 | 0.560 |
| Guangdong | 0.000 | 0.000 | 0.000 | 0.000 | 13.831 | 0.860 | 0.618 |
| Guangxi   | 0.000 | 0.000 | 0.000 | 0.000 | 26.557 | 0.752 | 0.503 |
| Hainan    | 0.000 | 0.000 | 0.000 | 0.000 | 10.545 | 0.878 | 0.387 |
| Chongqing | 0.000 | 0.000 | 0.000 | 0.000 | 24.160 | 0.763 | 0.621 |
| Sichuan   | 0.000 | 0.000 | 0.000 | 0.000 | 0.000  | 1.000 | 0.463 |
| Guizhou   | 0.000 | 0.000 | 0.000 | 0.000 | 0.000  | 1.000 | 0.816 |
| Yunnan    | 0.000 | 0.000 | 0.000 | 0.000 | 0.000  | 1.000 | 1.000 |
| Shaanxi   | 0.000 | 1.506 | 0.000 | 0.000 | 3.092  | 0.973 | 0.973 |
| Gansu     | 0.000 | 0.000 | 0.006 | 0.000 | 6.836  | 0.929 | 0.909 |
| Qinghai   | 0.000 | 0.000 | 0.000 | 0.000 | 0.000  | 1.000 | 1.000 |
| Ningxia   | 0.000 | 0.000 | 0.000 | 0.000 | 34.869 | 0.374 | 0.294 |
| Xinjiang  | 0.000 | 0.000 | 0.010 | 0.000 | 16.360 | 0.538 | 0.538 |

Table S10. Second stage DEA regulation of EVs in provinces

| DMUs         | Middle                  | Second stage |            | Final output        | Efficiency | Overall    |
|--------------|-------------------------|--------------|------------|---------------------|------------|------------|
|              | input/output            | input        |            |                     |            | efficiency |
|              | Electricity             |              |            | WTW                 |            |            |
|              | consumption<br>emission | Temperature  | Congestion | carbon<br>emissions |            |            |
| Beijing      | 0.000                   | 0.011        | 0.000      | 33.295              | 0.598      | 0.598      |
| Tianjin      | 0.000                   | 0.000        | 0.000      | 0.000               | 1.000      | 0.970      |
| Hebei        | 0.000                   | 0.004        | 0.000      | 12.250              | 0.788      | 0.788      |
| Shanxi       | 0.000                   | 0.009        | 0.000      | 6.161               | 0.846      | 0.846      |
| Neimenggu    | 0.000                   | 0.032        | 0.000      | 13.164              | 0.724      | 0.724      |
| Liaoning     | 0.000                   | 0.034        | 0.000      | 20.514              | 0.722      | 0.722      |
| Jilin        | 0.000                   | 0.042        | 0.000      | 55.014              | 0.330      | 0.214      |
| Heilongjiang | 0.000                   | 0.050        | 0.000      | 75.424              | 0.001      | 0.001      |
| Shanghai     | 0.000                   | 0.002        | 0.000      | 30.011              | 0.737      | 0.364      |
| Jiangsu      | 0.000                   | 0.002        | 0.000      | 18.887              | 0.777      | 0.449      |
| Zhejiang     | 0.000                   | 0.002        | 0.000      | 27.188              | 0.762      | 0.461      |
| Anhui        | 0.000                   | 0.000        | 0.000      | 24.044              | 0.548      | 0.395      |
| Fujian       | 0.000                   | 0.000        | 0.000      | 8.986               | 0.931      | 0.418      |
| Jiangxi      | 0.000                   | 0.000        | 0.000      | 41.726              | 0.574      | 0.306      |

|           |       |       |       |        |       |       |
|-----------|-------|-------|-------|--------|-------|-------|
| Shandong  | 0.000 | 0.001 | 0.000 | 7.685  | 0.848 | 0.689 |
| Henan     | 0.000 | 0.000 | 0.000 | 0.000  | 1.000 | 0.955 |
| Hubei     | 0.000 | 0.009 | 0.000 | 13.384 | 0.896 | 0.431 |
| Hunan     | 0.000 | 0.004 | 0.000 | 35.010 | 0.728 | 0.413 |
| Guangdong | 0.000 | 0.000 | 0.000 | 6.581  | 0.945 | 0.472 |
| Guangxi   | 0.000 | 0.000 | 0.000 | 26.308 | 0.811 | 0.354 |
| Hainan    | 0.000 | 0.000 | 0.000 | 35.730 | 0.725 | 0.345 |
| Chongqing | 0.000 | 0.000 | 0.000 | 18.251 | 0.871 | 0.474 |
| Sichuan   | 0.000 | 0.006 | 0.000 | 5.552  | 0.967 | 0.201 |
| Guizhou   | 0.000 | 0.000 | 0.000 | 0.000  | 1.000 | 0.601 |
| Yunnan    | 0.000 | 0.000 | 0.000 | 0.000  | 1.000 | 0.016 |
| Shaanxi   | 0.000 | 0.002 | 0.000 | 9.065  | 0.859 | 0.859 |
| Gansu     | 0.000 | 0.026 | 0.000 | 8.294  | 0.915 | 0.498 |
| Qinghai   | 0.000 | 0.000 | 0.000 | 0.000  | 1.000 | 0.324 |
| Ningxia   | 0.000 | 0.019 | 0.000 | 24.345 | 0.689 | 0.473 |
| Xinjiang  | 0.000 | 0.036 | 0.000 | 19.245 | 0.665 | 0.665 |

---
